# Supplementary material for: Bioactivity and Bactericidal Mechanism of Histidine-Rich β-Hairpin Peptide Against Gram-Negative Bacteria
Source: MDPI journal article supplement (doi:10.3390/ijms20163954), 2019-08-14
Supplement: s1 [file s1]

# Supporting information

## Title:

Bioactivity and bactericidal mechanism of histidine-rich  $\beta$ -hairpin peptide against Gram-negative bacteria

## Authors:

Na Dong, Chensi Wang, Tingting Zhang, Lei Zhang, Chenyu Xue, Xinjun Feng, Chongpeng Bi and Anshan Shan\*

## Contents of supporting information

|                                                                                                                                      |              |
|--------------------------------------------------------------------------------------------------------------------------------------|--------------|
| <b>Supplementary Figure S1:</b> MALDI-TOF MS of the engineered peptides.....                                                         | <b>S2-S3</b> |
| <b>Supplementary Figure S2:</b> HPLC spectra of the engineered peptides.....                                                         | <b>S4-S6</b> |
| <b>Supplementary Figure S3:</b> The Cytotoxicity of peptides against HEK 293T cells.....                                             | <b>S7</b>    |
| <b>Supplementary Table S1:</b> The MICs ( $\mu$ M) of HV2, Polymyxin B, Gentamicin, Vancomycin and Ceftazidime against Bacteria..... | <b>S8</b>    |

HI2

3.15e6

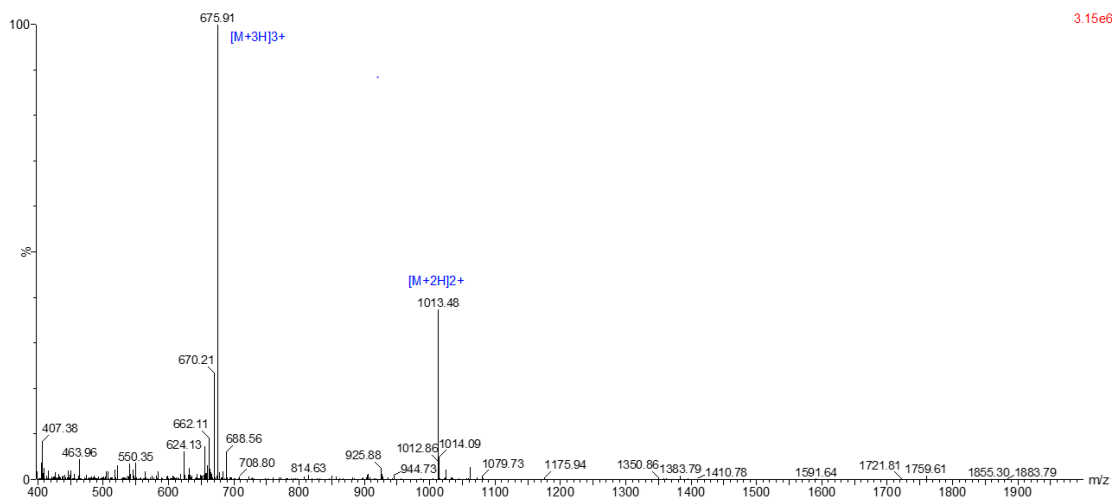

HV2

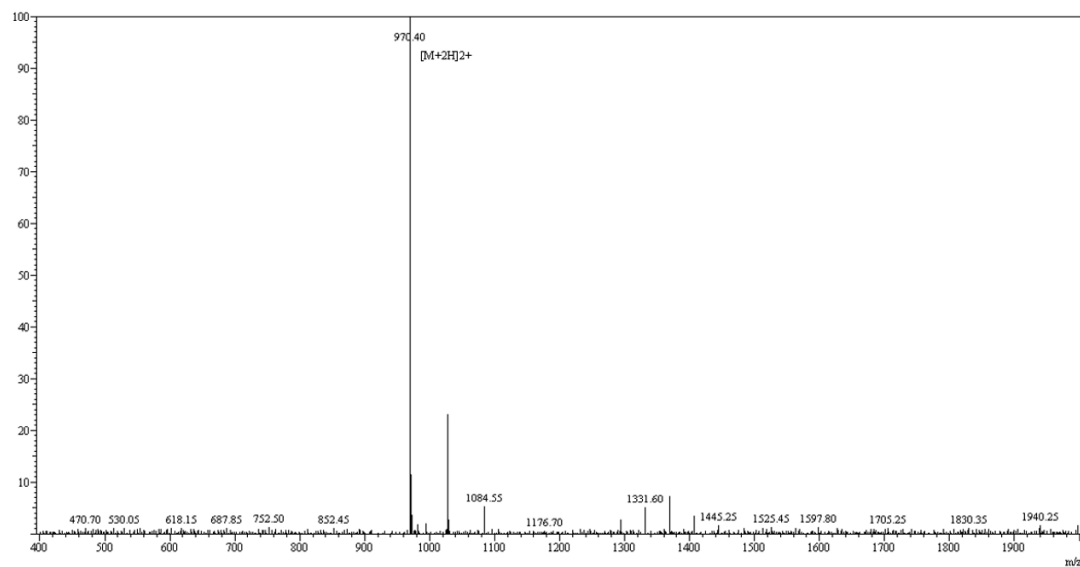

## HW2

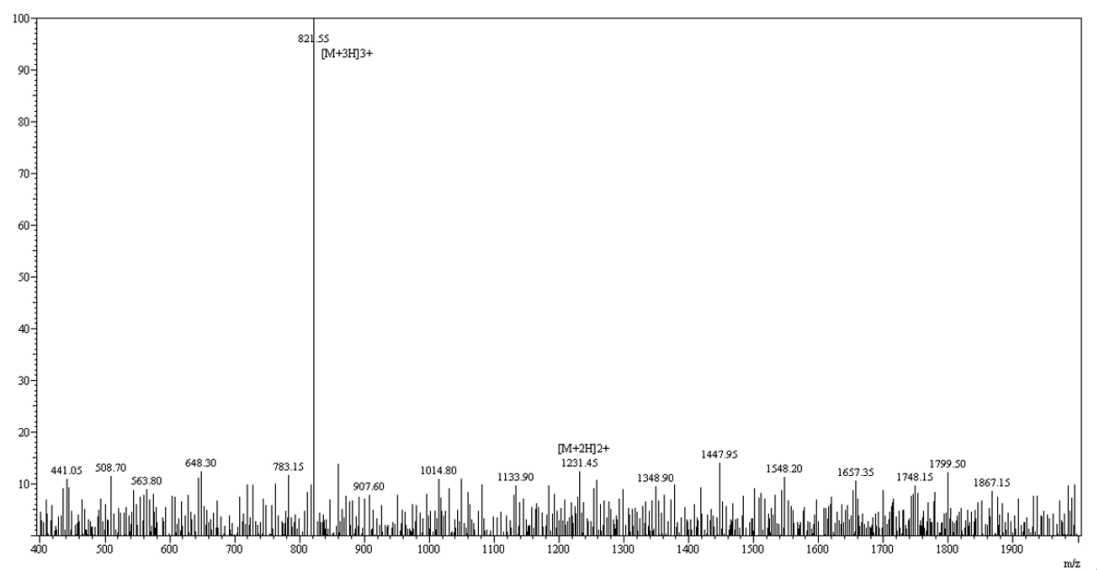

## HF2

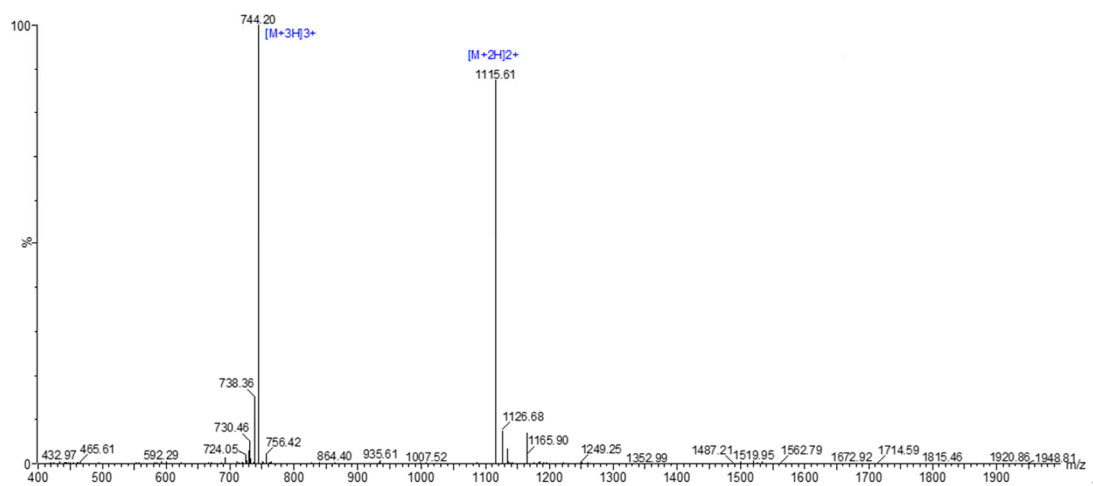

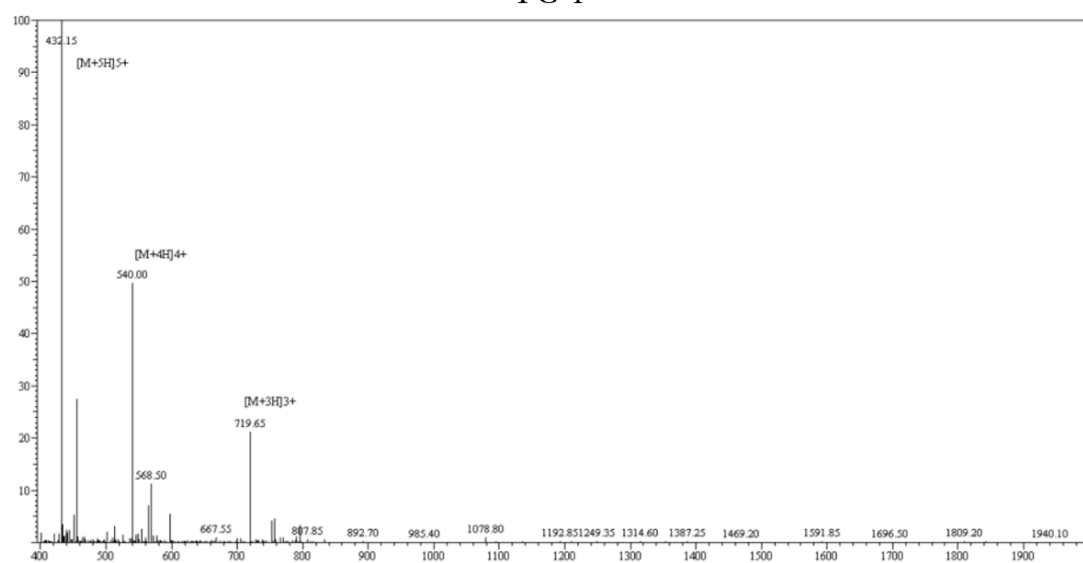

**Supplementary Figure S1:** MALDI-TOF MS of the engineered peptides

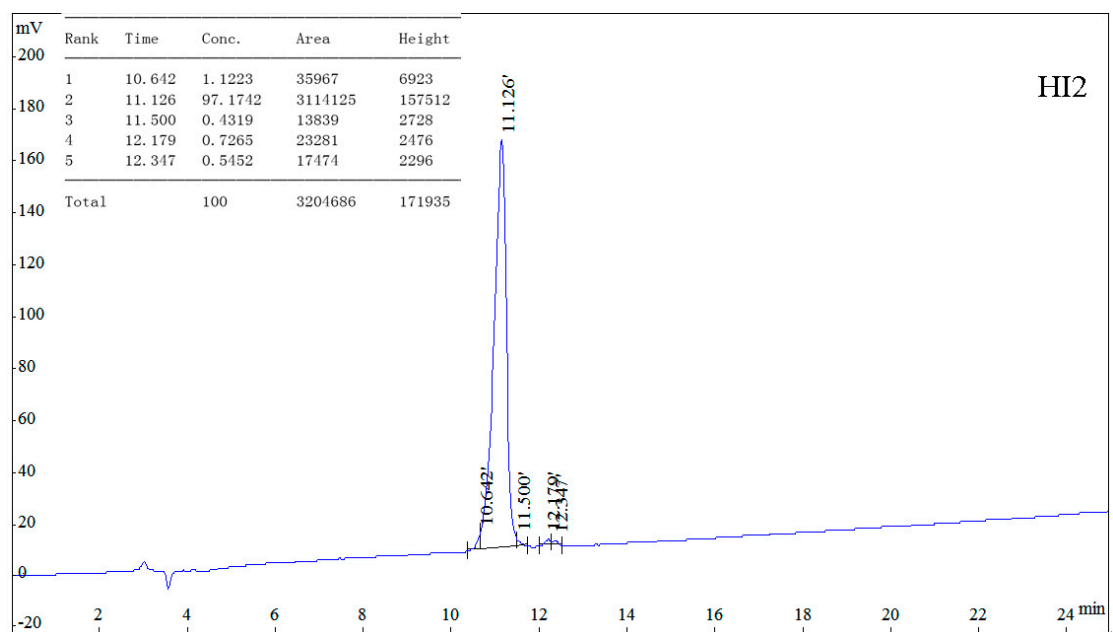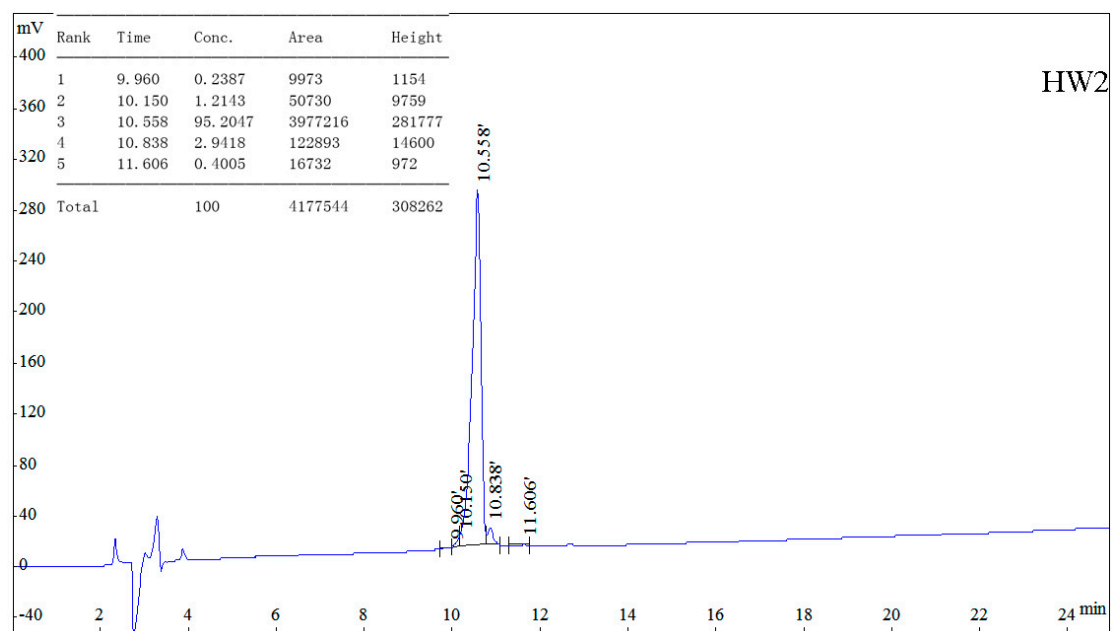

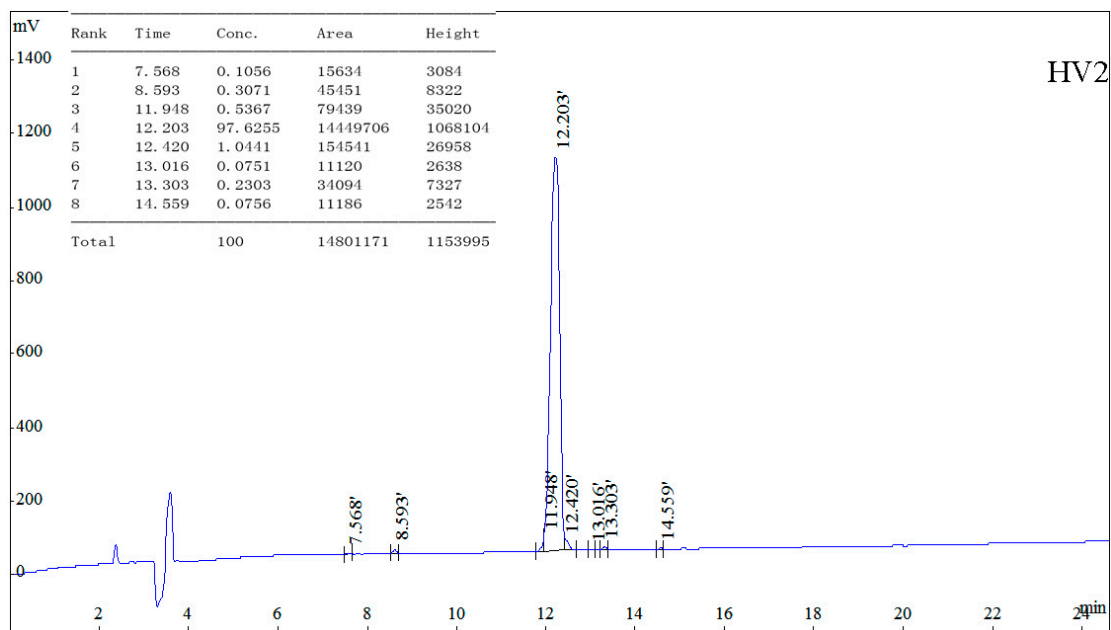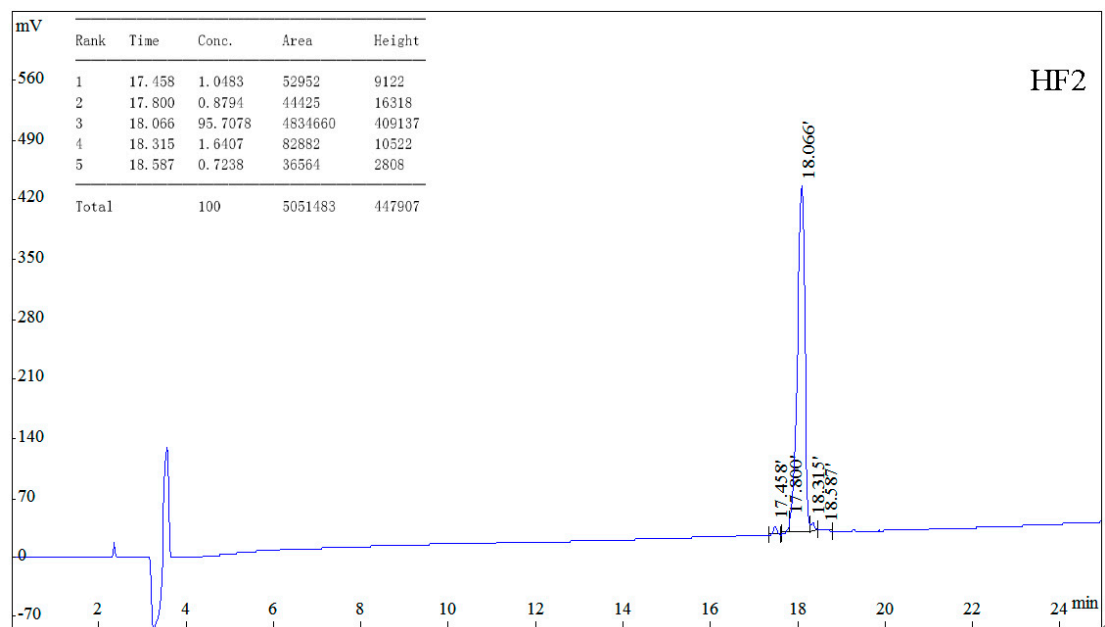

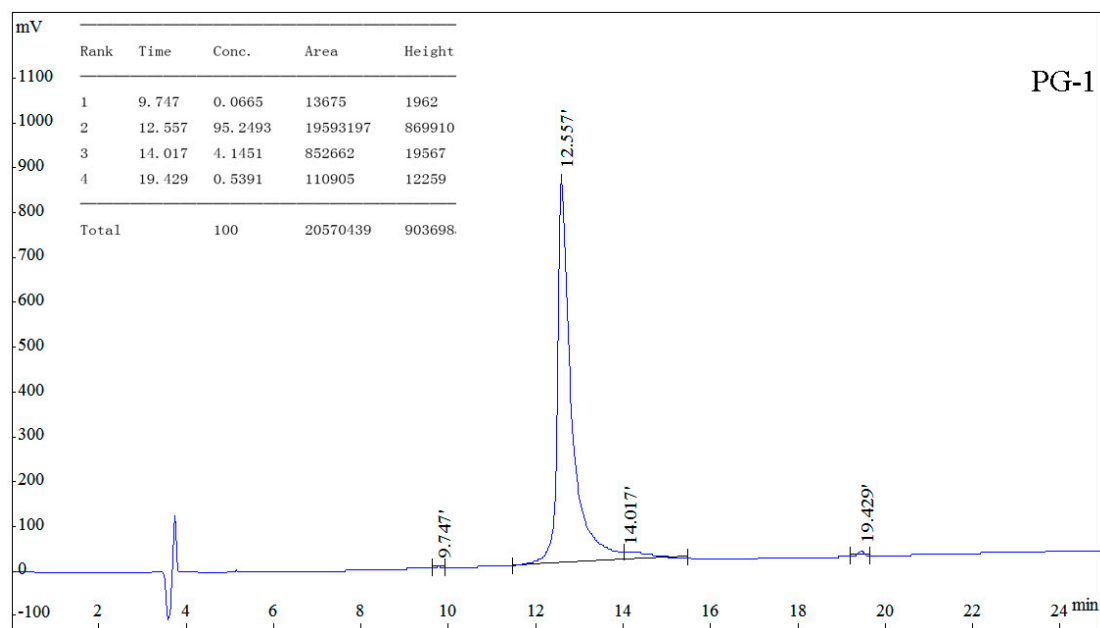

**Supplementary Figure S2:** HPLC spectra of the engineered peptides

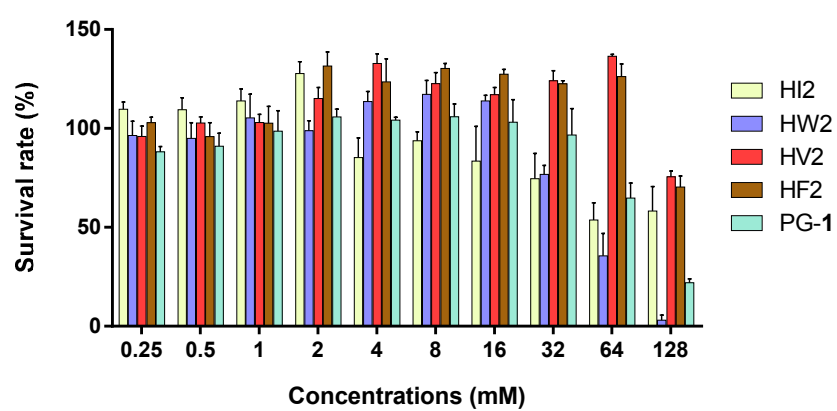

**Supplementar Figure S3:** Cytotoxicity of peptides against HEK 293T cells



Supplementary Table S1: The MICs<sup>a</sup> of HV2, Polymyxin B, Gentamicin, Vancomycin and Ceftazidime against Bacteria

|                            | HV2   | Polymyxin B | Gentamicin | Vancomycin | Ceftazidime |
|----------------------------|-------|-------------|------------|------------|-------------|
| MIC( $\mu$ M)              |       |             |            |            |             |
| <i>Gram-</i>               |       |             |            |            |             |
| <i>E.coli</i> 25922        | 8     | 2           | 1          | 8          | 2           |
| <i>E. coli</i> K88         | 4     | 0.5         | 1          | 2          | 1           |
| <i>E. coli</i> K99         | 8     | 1           | 0.5        | 4          | 0.5         |
| <i>E.coli</i> UB1005       | 8     | 1           | 0.5        | 16         | 1           |
| <i>S.pullorum</i> C7913    | 8     | 1           | 1          | 8          | 1           |
| <i>P. auruginosa</i> 27853 | 8     | 2           | 1          | >128       | 2           |
| <i>Gram+</i>               |       |             |            |            |             |
| <i>S.aureus</i> 29213      | >128  | 64          | 1          | 0.5        | 16          |
| <i>S.aureus</i> 43300      | >128  | 64          | 8          | 0.5        | 16          |
| <i>S.epidermidis</i> 12228 | >128  | 32          | 1          | 0.5        | 16          |
| MBC <sup>b</sup> (GM)      |       |             |            |            |             |
| <i>Gram (-)</i>            | 7.13  | 1.12        | 0.79       | 11.31      | 1.12        |
| <i>Gram (+)</i>            | 256   | 50.8        | 2          | 0.5        | 16          |
| <i>Gram (+,-)</i>          | 23.52 | 4           | 1.08       | 4          | 2.72        |

<sup>a</sup> Minimum inhibitory concentrations (MIC) were determined as the lowest concentration of peptides that prevented visible turbidity.

<sup>b</sup> The geometric mean (GM) of the peptides MICs against all four bacterial strains was calculated. When no detectable antimicrobial activity was observed at 128  $\mu$ M, a value of 256  $\mu$ M was used to calculate the therapeutic index.
